# Supplementary material
Source: publisher site journal article supplement (https://www.dovepress.com/get_supplementary_file.php?f=444891.docx)
Supplement: Supplementary file 1 [file get_supplementary_file.php]

**Supplementary Table 1 Sources of medicines**

| Country | England  (n=300) | Thailand  (n=352) | Uganda  (n=694) | Malaysia  (n=242) |
| --- | --- | --- | --- | --- |
| Community pharmacy | 59.0 (170) | 65.3 (230) | 46.8 (325) | 40.7 (98) |
| Hospital | 12.3 (37) | 57.4 (202) | 29.2 (203) | 45.9 (111) gov’t  20.2 (49) private |
| Private clinic | 2.7 (8) | 24.7 (87) | 14.0 (92) | 49.8 (120) |
| Drug store | 23.3 (70) | 9.1 (32) | 3.0 (21) | 1.2 (3) |
| Friends/family | 3.3 (10) | 5.1 (18) | 0.7 (4) | 7.9 (19) |
| Health centre/primary care clinic | 39.3 (118) | 6.5 (23) | 6.2 (43) | 11.6 (28) |
| Others | 18.0 (54) | 0.6 (2) | 0 (0) | 2.5 (6) |

**Supplementary Table 2 Medicine information received**

| Country | England  (n=300) | Thailand  (n=352) | Uganda  (n=694) | Malaysia  (n=242) |
| --- | --- | --- | --- | --- |
| Any information | 85.0 (255) | 97.7 (344) | 96.1 (667) | 80.2 (194) |
| *-Written* | 77.3 (197) | 65.1 (224) | 77.6 (518) | 43.4 (105) |
| *-Verbal* | 63.1 (161) | 91.3 (314) | 85.9 (573) | 73.6 (178) |
| *-Other source* | 9.8 (25) | 14.2 (49) | 1.0 (7) | 16.5 (40) |
| None | 15.0 (45) | 2.3 (8) | 1.7 (12) | 19.4 (47) |

**Supplementary Table 3 Likely use of and views on different information sources**

|  | **England** | | | | | **Thailand** | | | | | **Malaysia** | | | | | **Uganda** | | | | |
| --- | --- | --- | --- | --- | --- | --- | --- | --- | --- | --- | --- | --- | --- | --- | --- | --- | --- | --- | --- | --- |
| **Sources of medicine information** | **Yes  (% of 300)** | **Easy to access  (% of Yes)** | **Easy to understand  (% of Yes)** | **Relevant to me  (% of Yes)** | **Trustworthy  (% of Yes)** | **Yes  (% of 352)** | **Easy to access  (% of Yes)** | **Easy to understand  (% of Yes)** | **Relevant to me  (% of Yes)** | **Trustworthy  (% of Yes)** | **Yes  (% of 242)** | **Easy to access  (% of Yes)** | **Easy to understand  (% of Yes)** | **Relevant to me  (% of Yes)** | **Trustworthy  (% of Yes)** | **Yes  (% of 694)** | **Easy to access  (% of Yes)** | **Easy to understand  (% of Yes)** | **Relevant to me  (% of Yes)** | **Trustworthy  (% of Yes)** |
| Verbal from health professional | 275  (91.7) | 136  (49.5) | 179  (65.1) | 180  (65.5) | 233  (84.7) | 348 (98.9) | 65  (18.7) | 257  (73.9) | 62  (17.8) | 258  (74.1) | 223 (92.1) | 147 (65.9) | 176 (78.9) | 164 (73.5) | 185 (83.0) | 674 (97.1) | 67  (9.9) | 457 (67.8) | 32  (4.7) | 118 (17.5) |
| Drug company information on medicine container | 135  (45) | 88  (65.2) | 66  (48.9) | 53  (39.3) | 53  (39.3) | 298 (84.7) | 146  (49.0) | 141  (47.3) | 37  (12.4) | 115  (38.6) | 134 (55.4) | 101 (75.4) | 82 (61.2) | 97 (72.4) | 88 (65.7) | 511 (73.6) | 132 (25.8) | 228  (44.6) | 75  (14.7) | 76  (14.9) |
| Dispensing label/ medicine envelope | 159  (53) | 117  (73.6) | 99  (62.3) | 99  (62.3) | 92  (57.9) | 317 (90.1) | 123  (38.8) | 188  (59.3) | 59  (18.6) | 89  (28.1) | 164 (67.8) | 128 (94.8) | 116 (85.9) | 121 (89.6) | 114 (84.4) | 629  (90.6) | 114  (18.1) | 362  (57.5) | 79  (12.6) | 74 (11.8) |
| Leaflet with medicine | 211  (70.3) | 170  (80.6) | 143  (67.8) | 122  (57.8) | 130  (61.6) | 287 (81.5) | 127  (44.3) | 151  (52.6) | 39  (13.6) | 96  (33.4) | 104 (43.0) | 77 (74.0) | 65 (62.5) | 68 (65.4) | 67 (64.4) | 336 (48.4) | 51  (15.2) | 99 (29.5) | 81  (24.1) | 105  (31.2) |
| Leaflet from health workers | 83  (27.7) | 48  (57.8) | 54  (65.1) | 38  (45.8) | 56  (67.5) | 265 (75.3) | 70  (26.4) | 116  (43.8) | 43  (16.2) | 169  (63.8) | 65 (26.9) | 35 (53.8) | 42 (64.6) | 35 (53.8) | 40 (61.5) | 359  (51.7) | 48  (13.4) | 97  (27.0) | 102  (28.4) | 112  (31.2) |
| Government website | 157  (52.3) | 121  (77.1) | 108  (68.8) | 85  (54.1) | 117  (74.5) | 192 (54.5) | 109  (56.8) | 48  (25.0) | 19  (9.9) | 89  (46.4) | 78 (32.2) | 53 (67.9) | 44 (56.4) | 49 (62.8) | 59 (75.6) | 25  (3.6) | 8 (32.0) | 5  (20.0) | 8 (32.0) | 4 (16.0) |
| Manufacturer website | 46  (15.3) | 25  (54.3) | 13  (28.3) | 15 (32.6) | 18  (39.1) | 174 (49.4) | 93  (53.4) | 55  (31.6) | 16  (9.2) | 70  (40.2) | 56 (23.1) | 39 (69.6) | 33 (58.9) | 41 (73.2) | 48 (85.7) | 60 (8.6) | 2 (3.3) | 15 (25.0) | 18 (30.0) | 25 (41.7) |
| Patient support group website | 73 (24.3) | 49  (67.1) | 47  (64.4) | 42 (57.5) | 38  (52.1) | 157 (44.6) | 76  (48.4) | 55  (35.0) | 14  (8.9) | 58  (36.9) | 48 (19.8) | 26 (54.2) | 26 (54.2) | 27 (56.3) | 29 (60.4) | 28 (4.0) | 3 (10.7) | 8 (28.6) | 10 (35.7) | 7 (25.0) |
| Pharmacy website | 61  (20.3) | 43  (70.5) | 33  (54.1) | 20  (32.8) | 29  (47.5) | 162 (46.0) | 87  (53.7) | 54  (33.3) | 21  (13.0) | 48  (29.6) | 78 (32.2) | 60 (76.9) | 52 (66.7) | 46 (59.0) | 53 (67.9) | n/a | n/a | n/a | n/a | n/a |
| Hospital website | 44  (14.7) | 26  (59.1) | 20  (45.5) | 12  (27.3) | 27 (61.4) | 18 (53.4) | 95  (50.5) | 61  (32.4) | 18  (9.6) | 95  (50.5) | 56 (23.1) | 37 (66.1) | 31 (55.4) | 31 (55.4) | 40 (71.4) | 34 (4.9) | 2 (5.9) | 11 (32.4) | 13 (38.2) | 8 (23.5) |
| Advertising on TV/radio/magazine | 48  (16.0) | 38  (79.2) | 33  (68.8) | 13  (27.1) | 8  (16.7) | 178 (50.6) | 113  (63.5) | 82  (46.1) | 11  (6.2) | 29  (16.3) | 50 (20.7) | 34 (68.0) | 32 (64.0) | 17 (34.0) | 18 (36.0) | 186 (26.8) | 56 (30.1) | 72 (38.7) | 54 (29.0) | 4 (2.2) |
| News reports | 43  (14.3) | 34  (79.1) | 24  (55.8) | 10  (23.3) | 4  (9.3) | 186 (52.8) | 126  (67.7) | 73  (39.2) | 17  (9.1) | 30  (16.1) | 49 (20.2) | 32 (65.3) | 30 (61.2) | 23 (46.9) | 23 (46.9) | 105 (15.1) | 17 (16.2) | 15 (14.3) | 66 (62.9) | 7 (6.7) |
| Mobile application | 67  (22.3) | 59  (88.1) | 38  (56.7) | 28  (41.8) | 23  (34.3) | 184 (52.3) | 130  (70.7) | 72  (39.1) | 27  (14.7) | 21  (11.4) | 50 (20.7) | 40 (80.0) | 26 (52.0) | 22 (44.0) | 16 (32.0) | 55 (7.9) | 30 (54.6) | 10 (18.2) | 14 (25.4) | 1 (1.8) |
| Social media/family and friends | 112  (37.3) | 85  (75.9) | 73  (65.2) | 65  (58.0) | 63 (56.3) | 183  (52.0) | 119  (65.0) | 73  (39.9) | 39  (21.3) | 16  (8.7) | 86 (35.5) | 61 (70.9) | 51 (59.3) | 42 (48.8) | 26 (30.2) | 72 (10.4) | 40 (55.6) | 10 (13.9) | 22 (30.6) | 0 (0.0) |
| Digital platform | 19  (6.3) | 14  (73.7) | 6  (31.6) | 4  (21.1) | 2 (10.5) | 99  (28.1) | 72  (72.7) | 31  (31.3) | 9  (9.1) | 12  (12.1) | 28 (11.6) | 21 (75.0) | 14 (50.0) | 10 (35.7) | 5 (17.9) | n/a | n/a | n/a | n/a | n/a |

n/a = not applicable
